# Supplementary material for: Assessing the Environmental Impacts of Household Water Supply: A Case Study Considering Consumption Patterns within a Life-Cycle Perspective
Source: MDPI journal article supplement (doi:10.3390/su15031946), 2023-01-19
Supplement: s1 [file s1]

Archive with 1 entries (1 files):
- sustainability-2127628-supplementary.pdf
